# Supplementary material
Source: PubMed Central journal article supplement (PMC4501470)

## Supplementary Online Content

Lindenauer PK, Stefan MS, Shieh M-S, Pekow PS, Rothberg MB, Hill NS. Outcomes associated with invasive and noninvasive ventilation among patients hospitalized with exacerbations of chronic obstructive pulmonary disease [published online October 27, 2014]. *JAMA Intern Med*. doi:10.1001/jamainternmed.2014.5430.

**eFigure 1.** Distribution of propensity for treatment with NIV by initial treatment method

**eFigure 2.** Distribution of percentage of ventilator starts on the first or second hospital day that were noninvasive across hospitals included in the study

This supplementary material has been provided by the authors to give readers additional information about their work.

eFigure 1. Distribution of propensity for treatment with NIV by initial treatment method

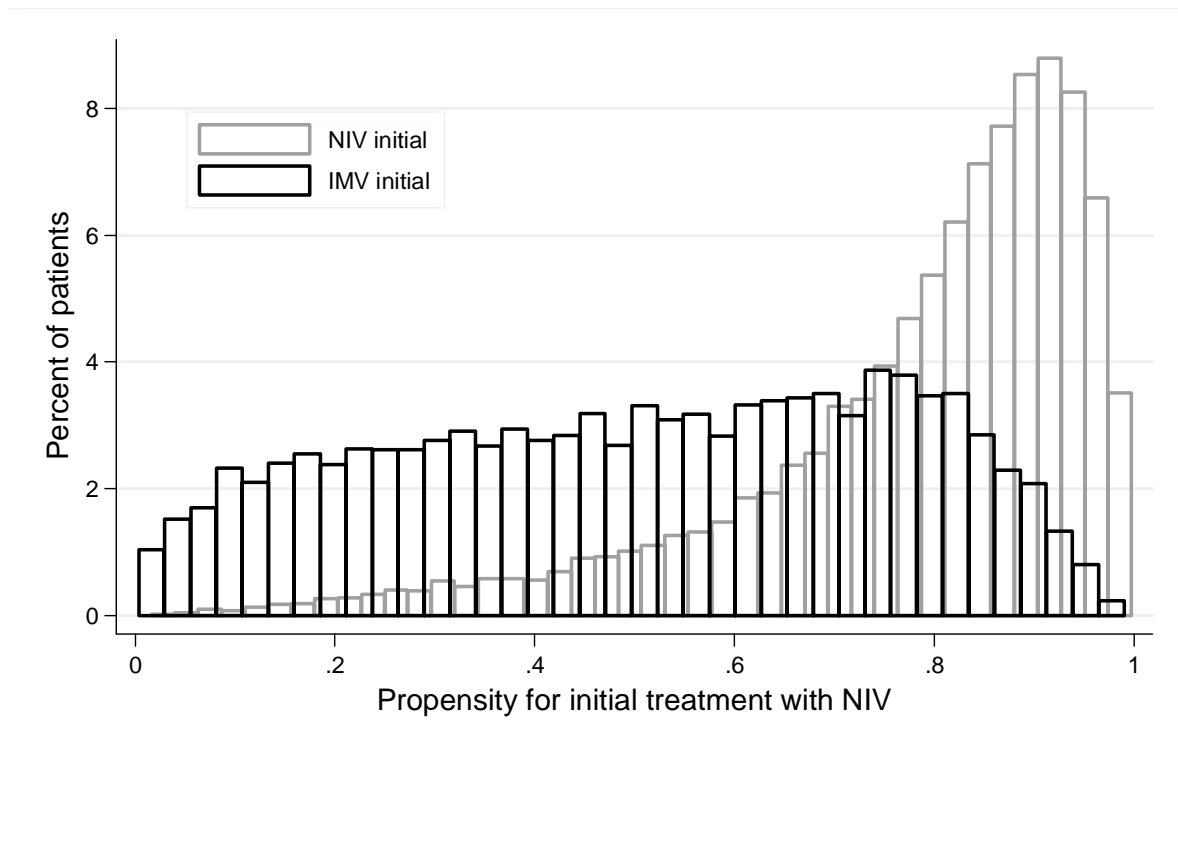

eFigure 2. Distribution of percentage of ventilator starts on the first or second hospital day that were noninvasive across hospitals included in the study.

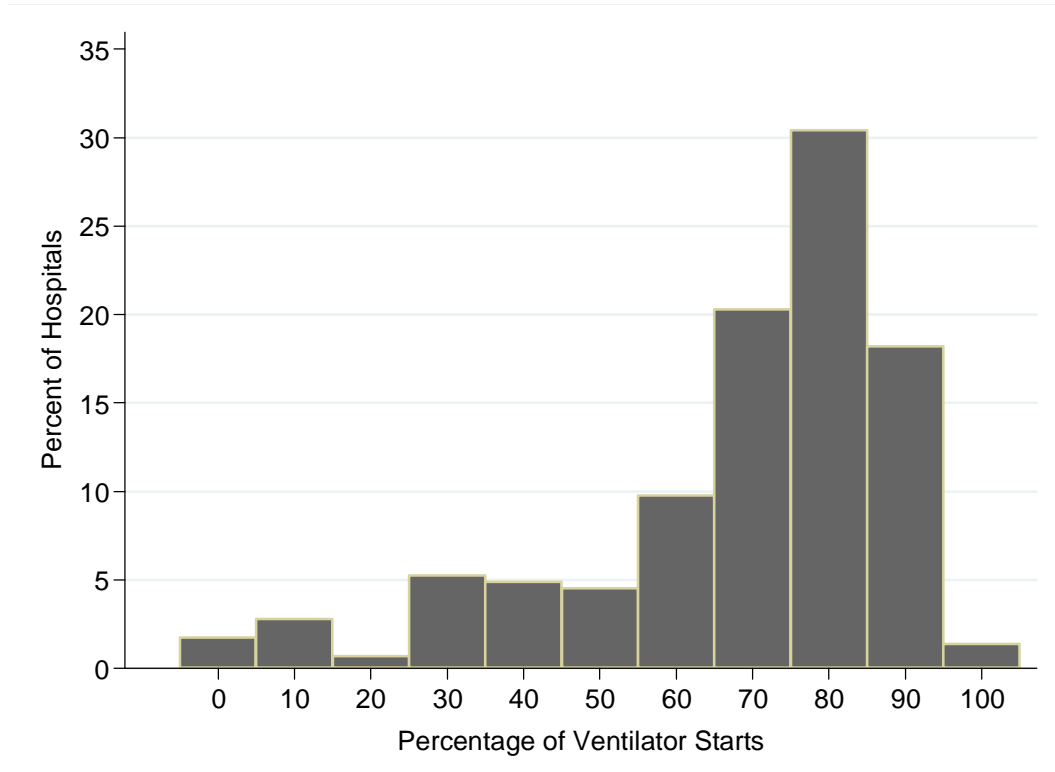

Supplement: NIHMS704678-supplement-eFigures_1___2.pdf [file NIHMS704678-supplement-eFigures_1___2.pdf]
